# Supplementary material for: Pressure effects and Mössbauer spectroscopic studies on a 3D mixed-valence iron spin-crossover complex with NiAs topology
Source: Royal Society of Chemistry journal article supplement (doi:10.1039/b718456e), 2008-01-01
Supplement: b718456e.pdf [file b718456e.pdf]

# Pressure effects and Mössbauer spectroscopic studies on a 3D mixed-valence iron spin-crossover complex with NiAs topology

Yue-Ling Bai,<sup>a</sup> Jun Tao,<sup>a\*</sup> Rong-Bin Huang,<sup>a</sup> Lan-Sun Zheng,<sup>a</sup> Shao-Liang Zheng,<sup>b\*</sup> Kazuyoshi Oshida<sup>c</sup> and Yasuaki Einaga<sup>c\*</sup>

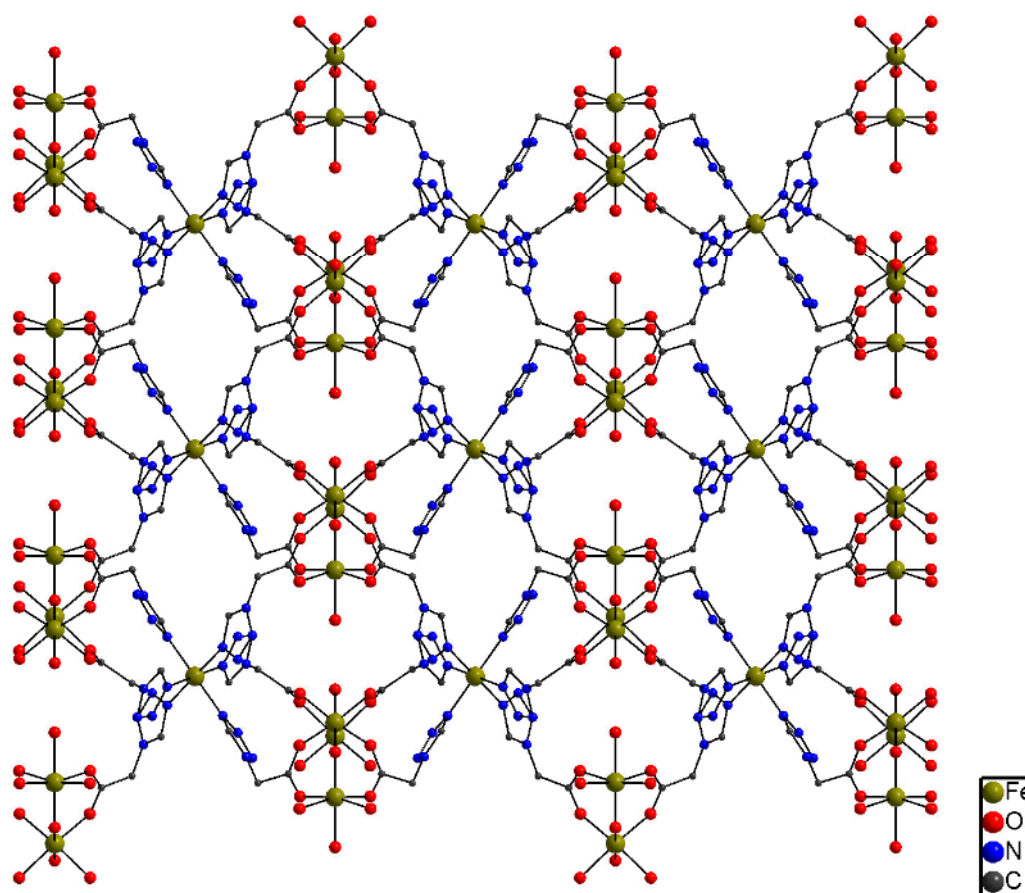

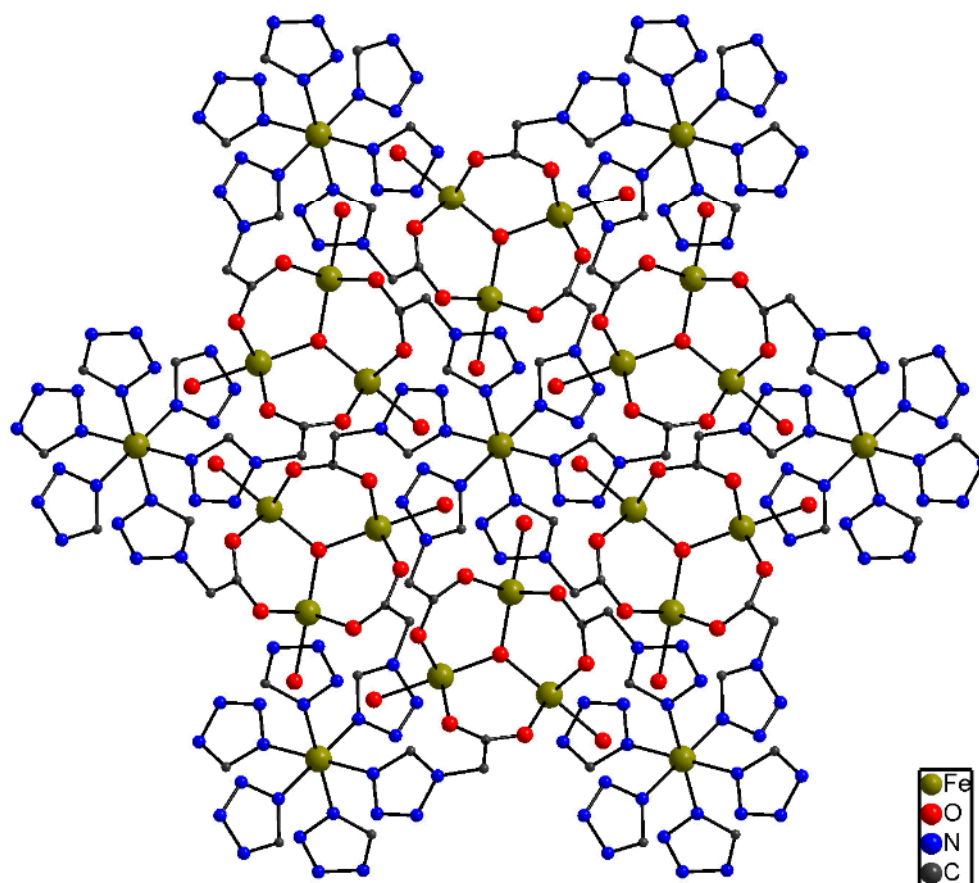

**Figure S1.** Three-dimensional frameworks of **1** viewed along the *a* axis (top) and *c* axis (bottom).

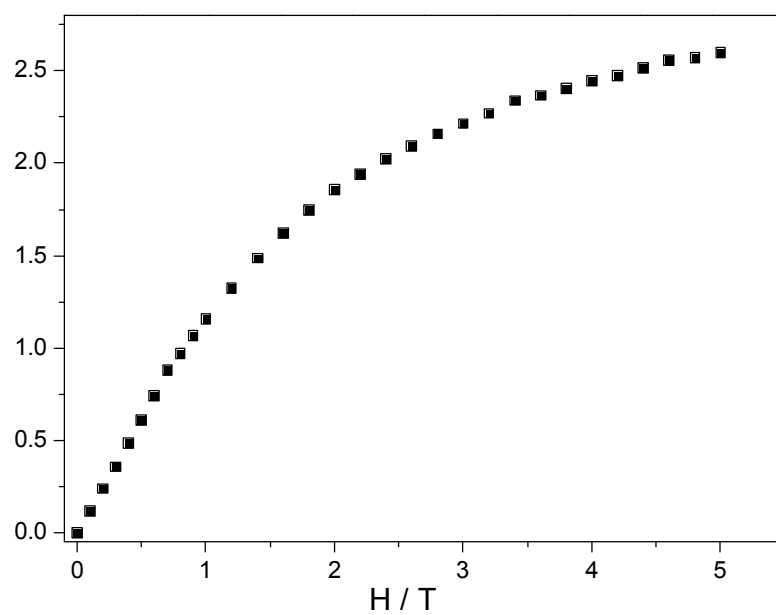

**Figure S2.** Field-dependent magnetization of **1**.

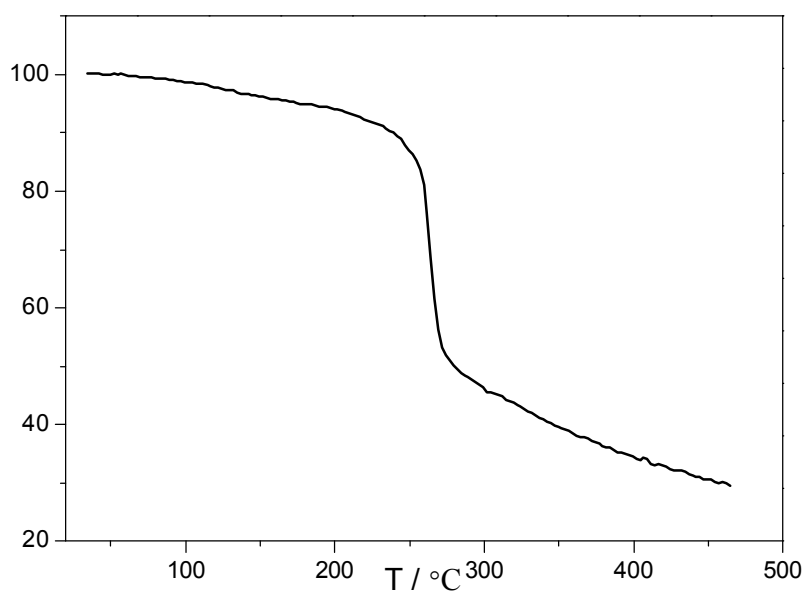

**Figure S3.** TG of **1**.

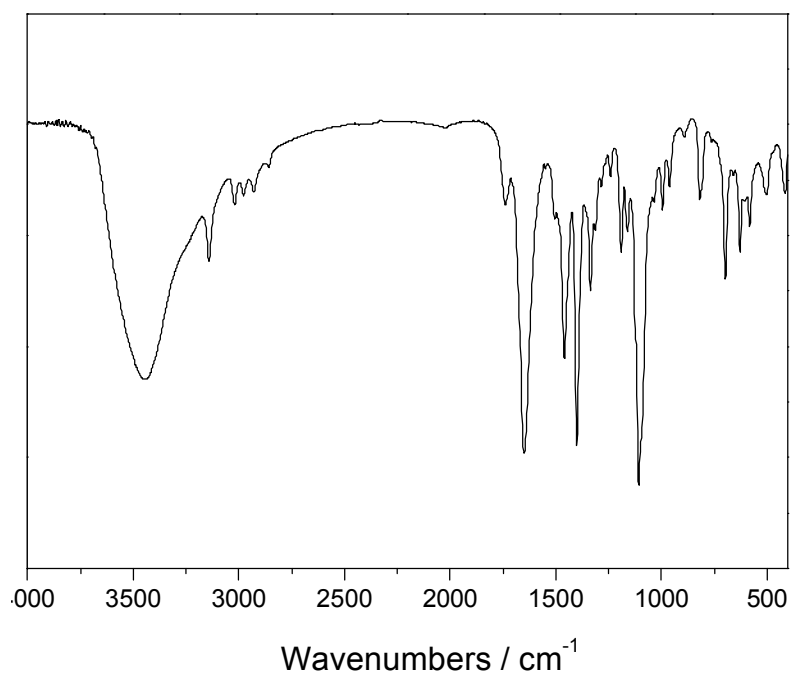

**Figure S4.** Infrared spectra of complex **1**.
